# Supplementary material for: Ftsh Sensitizes Methicillin-Resistant Staphylococcus aureus to β-Lactam Antibiotics by Degrading YpfP, a Lipoteichoic Acid Synthesis Enzyme
Source: MDPI journal article supplement (doi:10.3390/antibiotics10101198), 2021-10-01
Supplement: s1 [file s1]

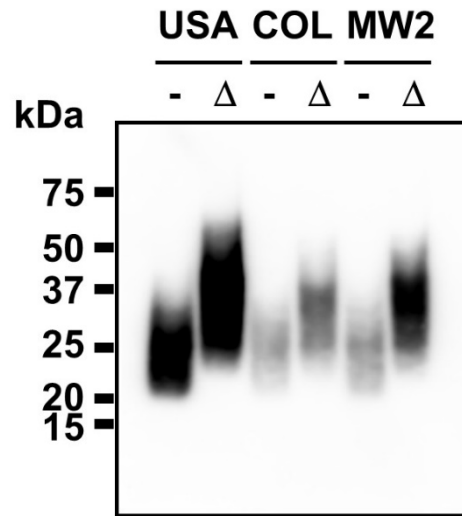

Fig. S1. The effect of the *ypfP*-deletion on the LTA expression in three different *S. aureus* strains. -, wild-type;  $\Delta$ , a *ypfP*-transposon insertion mutant. USA, USA300.

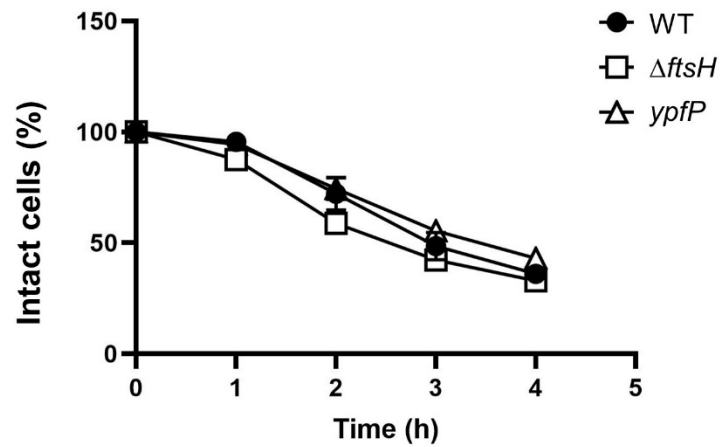

Fig. S2. The effect of the *ftsH* and the *ypfP* mutation on the autolysis activity of *S. aureus* USA300. WT, wild-type;  $\Delta ftsH$ , *ftsH*-deletion mutant; *ypfP*, a *ypfP* transposon insertion mutant.

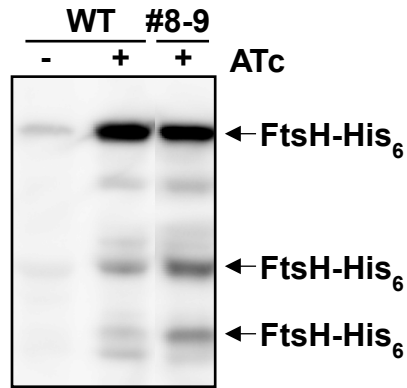

**Fig. S3. FtsH expression in the wild-type and the suppressor mutant #8-9.** All the strains contain the FtsH-expression plasmid pYJ-ftsH-His<sub>6</sub>. FtsH expression was examined with an anti-His<sub>6</sub> antibody. ATc, anhydrotetracycline (100 ng/ml). Note that FtsH appears to be self-processed, as described previously {Akiyama, 1999 #6524}.

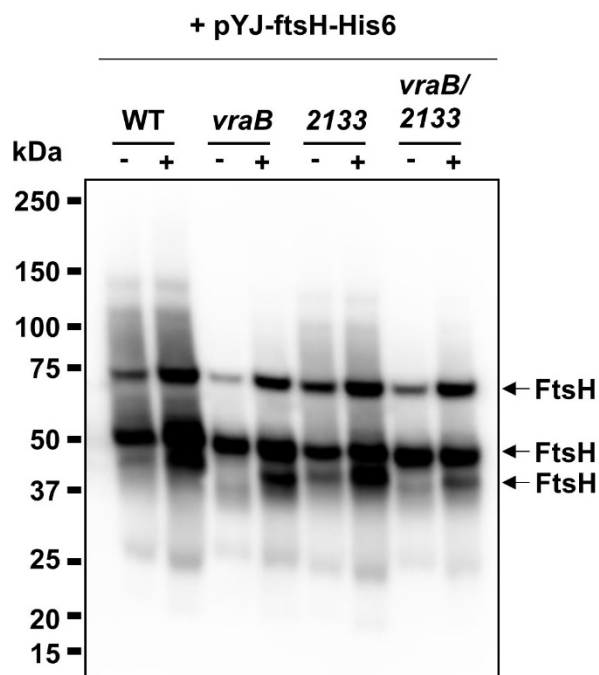

**Fig. S4 FtsH expressions in the wild-type, *vraB*, 2133, and the *vraB*/2133 double mutant containing pYJ-ftsH-His6.** FtsH expression was examined with an anti-FtsH antibody. The FtsH protein and its fragment species are indicated with arrows. -, no anhydrotetracycline; +, the addition of anhydrotetracycline. WT, USA300 wild-type; *vraB*, USA300::*vraB*(V144S); 2133, USA300::2133(V220L)

Table S1. Oxacillin MICs of FtsH-target gene mutants of USA300.

| Mutated gene | Gene product                              | MIC (µg/ml) |
|--------------|-------------------------------------------|-------------|
| -*           |                                           | 8           |
| <i>lrgB</i>  | antiholin-like protein LrgB               | 4           |
| 0310         | hypothetical protein                      | 8           |
| 0579         | hypothetical protein                      | 8           |
| <i>saeQ</i>  | SaeS regulatory protein SaeQ              | 8           |
| <i>ypfP</i>  | diacylglycerol glucosyltransferase        | 0.5         |
| <i>cydA</i>  | cytochrome D ubiquinol oxidase, subunit I | 8           |
| <i>cyoE</i>  | protoheme IX farnesyltransferase          | 8           |
| <i>hemA</i>  | glutamyl-tRNA reductase                   | 8           |
| <i>htrA</i>  | putative serine protease                  | 8           |
| <i>mbtS</i>  | membrane-bound transcription factor       | 8           |
| <i>hslO</i>  | Hsp33-like chaperonin                     | 8           |
| <i>hrtA</i>  | ATP-binding protein                       | 8           |
| <i>hrtB</i>  | ABC transporter permease protein          | 8           |
| 2637         | conserved hypothetical protein            | 8           |

\* -, no mutation

Table S2. β-lactam resistance of *ypfP* mutants in three MRSA strain backgrounds.

| Strains              | MIC (µg/ml) |            |           |
|----------------------|-------------|------------|-----------|
|                      | Oxacillin   | Cefotaxime | Cefazolin |
| USA300               | 8           | 32         | 32        |
| USA300:: <i>ypfP</i> | 0.5         | 2          | 0.5       |
| COL                  | 256         | 128        | 32        |
| COL:: <i>ypfP</i>    | 0.125       | 2          | 0.5       |
| MW2                  | 8           | 32         | 128       |
| MW2:: <i>ypfP</i>    | 0.125       | 2          | 0.5       |

**Table S3. The effect of the *ypfP*-deletion and the core suppressor mutations on the oxacillin MIC of the USA300.**

| <b>Strains</b>                  | <b>MIC (μg/ml)</b> |
|---------------------------------|--------------------|
| WT                              | 8                  |
| <i>ΔftsH</i>                    | 64                 |
| <i>ΔypfP</i>                    | 0.5                |
| <i>ΔftsHΔypfP</i>               | 0.5                |
| WT (pYJ-ftsH-His <sub>6</sub> ) | 0.5                |
| #8-9*                           | 32                 |
| #8-13*                          | 32                 |
| #8-9C**                         | 32                 |
| #8-9C:: <i>ypfP</i>             | 0.125              |

\* These strains contain pYJ-ftsH-His<sub>6</sub>

\*\* #8-9 without pYJ-ftsH-His<sub>6</sub>

**Table S4. Bacterial strains and plasmids used in this study**

| Strain/ plasmid                            | Relevant characteristic                                                                      | Source                 |
|--------------------------------------------|----------------------------------------------------------------------------------------------|------------------------|
| <i>E. coli</i>                             |                                                                                              |                        |
| DH5 $\alpha$                               | Plasmid free, Lac-                                                                           | New England<br>Biolabs |
| <i>S. aureus</i>                           |                                                                                              |                        |
| RN4220                                     | Restriction deficient, prophage cured                                                        | [48]                   |
| USA300-0114                                | Clinical isolate                                                                             | NARSA*                 |
| COL                                        | Clinical isolate                                                                             | [33]                   |
| MW2                                        | Clinical isolate                                                                             | [34]                   |
| USA300-P23                                 | USA300-0114 without plasmid 2 and 3                                                          | [49]                   |
| USA300 $\Delta$ <i>ftsH</i>                | <i>ftsH</i> -deletion mutant of USA300-P23                                                   | [21]                   |
| USA300:: <i>mecA</i>                       | Transposon insertion in <i>mecA</i> in NE1868<br>transduced into USA300-P23                  | This study             |
| USA300 $\Delta$ <i>ftsH</i> :: <i>mecA</i> | Transposon insertion in <i>mecA</i> in NE1868<br>transduced into USA300 $\Delta$ <i>ftsH</i> | This study             |
| USA300:: <i>ypfP</i>                       | Transposon insertion in <i>ypfP</i> in NE1663 was<br>transduced into USA300-P23              | This study             |

|                      |                                                                            |            |
|----------------------|----------------------------------------------------------------------------|------------|
| USA300:: <i>lrgB</i> | Transposon insertion in <i>lrgB</i> in NE1726 transduced into USA300-P23   | This study |
| USA300::0310         | Transposon insertion in SAUSA300_0310 in NE1254 transduced into USA300-P23 | This study |
| USA300::0579         | Transposon insertion in SAUSA300_0579 in NE219 transduced into USA300-P23  | This study |
| USA300:: <i>saeQ</i> | Transposon insertion in <i>saeQ</i> in NE1549 transduced into USA300-P23   | This study |
| USA300:: <i>cydA</i> | Transposon insertion in <i>cydA</i> in NE117 transduced into USA300-P23    | This study |
| USA300:: <i>cyoE</i> | Transposon insertion in <i>cyoE</i> in NE1434 transduced into USA300-P23   | This study |
| USA300:: <i>hemA</i> | Transposon insertion in <i>hemA</i> in NE1742 transduced into USA300-P23   | This study |
| USA300:: <i>htrA</i> | Transposon insertion in <i>htrA</i> in NE1141 transduced into USA300-P23   | This study |
| USA300:: <i>mbtS</i> | Transposon insertion in <i>mbtS</i> in NE132 transduced into USA300-P23    | This study |
| USA300:: <i>hslO</i> | Transposon insertion in <i>hslO</i> in NE1128 transduced into USA300-P23   | This study |

|                                            |                                                                                                                                                           |            |
|--------------------------------------------|-----------------------------------------------------------------------------------------------------------------------------------------------------------|------------|
| USA300:: <i>hrtA</i>                       | Transposon insertion in <i>hrtA</i> in NE1489 transduced into USA300-P23                                                                                  | This study |
| USA300:: <i>hrtB</i>                       | Transposon insertion in <i>hrtB</i> in $\Phi$ NE-8752 transduced into USA300-P23                                                                          | This study |
| USA300::2637                               | Transposon insertion in SAUSA300_2637 in NE1164 transduced into USA300-P23                                                                                | This study |
| USA300 $\Delta$ <i>ftsH</i> :: <i>ypfP</i> | Transposon insertion in <i>ypfP</i> in NE1663 transduced into USA300 $\Delta$ <i>ftsH</i>                                                                 | This study |
| COL:: <i>ypfP</i>                          | Transposon insertion in <i>ypfP</i> in NE1663 was transduced into COL                                                                                     | This study |
| MW2:: <i>ypfP</i>                          | Transposon insertion in <i>ypfP</i> in NE1663 was transduced into MW2                                                                                     | This study |
| #8-9                                       | A suppressor mutant of USA300 $\Delta$ <i>ftsH</i> (pYJ- <i>ftsH</i> -His <sub>6</sub> ) whose oxacillin MIC is not affected by FtsH overexpression       | This study |
| #8-13                                      | Another suppressor mutant of USA300 $\Delta$ <i>ftsH</i> (pYJ- <i>ftsH</i> -His <sub>6</sub> ) whose oxacillin MIC is not affected by FtsH overexpression | This study |
| #8-9C                                      | #8-9 without pYJ- <i>ftsH</i> -His <sub>6</sub>                                                                                                           | This study |
| USA300:: <i>vraB</i> (V144S)               | The <i>vraB</i> (V144S) mutation was introduced into USA300-P23                                                                                           | This study |

|                                              |                                                                                                |            |
|----------------------------------------------|------------------------------------------------------------------------------------------------|------------|
| USA300::2133(V220L)                          | The SAUSA300_2133 (V220L) mutation was introduced into USA300-P23                              | This study |
| USA300:: <i>vraB</i> (V144S)<br>/2133(V220L) | The <i>vraB</i> (V144S) and the SAUSA300_2133 (V220L) mutation were introduced into USA300-P23 | This study |
| #8-9C:: <i>ypfP</i>                          | Transposon insertion in <i>ypfP</i> in NE1663 was transduced into #8-9C                        | This study |

### Plasmids

|                           |                                                                                                 |            |
|---------------------------|-------------------------------------------------------------------------------------------------|------------|
| pYJ335                    | An <i>E. coli</i> - <i>S. aureus</i> shuttle vector with anhydrotetracycline-inducible promoter | [50]       |
| pYJ-ftsH-His <sub>6</sub> | pYJ335 containing the <i>ftsH</i> gene with His-tag sequence at the C-terminus                  | [20]       |
| pKOR1                     | An allelic replacement plasmid for <i>S. aureus</i>                                             | [40]       |
| pKOR1- <i>vraB</i>        | pKOR1 carrying a 2-kb fragment with the <i>vraB</i> (V144S) mutation                            | This study |
| pKOR1-2133                | pKOR1 carrying a 2-kb fragment with the SAUSA300_2133 (V220L) mutation                          | This study |

---

\* Network on Antimicrobial Resistance in *Staphylococcus aureus*.



**Table S5. Oligonucleotides used in this study**

| Name  | Sequence (5' > 3')                              | Target      |
|-------|-------------------------------------------------|-------------|
| P3764 | TAAAATAAGCTTGATATCGATGGGAAGTAGGAGGAAATG         | <i>ftsH</i> |
| P3765 | TGACATTAGAAAACCGACTGCGTACTTCCAATCCAATGC         | <i>ftsH</i> |
| P3766 | AGCATTGGATTGGAAGTACGCAGTCGGTTTTCTAATGTCAC       | pYJ335      |
| P3767 | TCATTTCTCCTACTTCCCATCGATATCAAGC                 | pYJ335      |
| P4043 | CCAAGCCGGAGCTGGC                                | <i>vraB</i> |
| P4044 | GGAATATGTGATTTTAGACTTTCATCAGTGTTG               | <i>vraB</i> |
| P4045 | GGCAATGCCTCAGTACGCG                             | 2133        |
| P4046 | ATTGCCAGGACGTTTCGACGG                           | 2133        |
| P4203 | CTGCTAGCTAGCTAGAGATGCAGTGGAGATAAGCTGCATTCTTC    | <i>vraB</i> |
| P4204 | AACCGGTACCAATGGATCATTAACTTCATCTCTACTTCATCGCC    | <i>vraB</i> |
| P4205 | CTGCTAGCTAGCTAGAGATGGATGTGTTTGAATAATGGCAATGACAG | 2133        |
| P4206 | AACCGGTACCAATGGATGCCCCGTGGCATTTCATCCG           | 2133        |
| P4246 | ACGTTGAGCCTCGGAACCGG                            | pKOR1       |
| P4248 | GTTAGTTTACAACAATGAACATACAATCCAATC               | <i>vraB</i> |
| P4249 | GTATCACATAACTCTTGAAAACGATTACAAAATCG             | 2133        |
